# Supplementary material for: Pharmaceutical wastewater treatment using TiO 2 nanosheets deposited by cobalt co-catalyst as hybrid photocatalysts: combined experimental study and artificial intelligence modeling
Source: publisher site journal article supplement (doi:10.1515/cppm-2022-0070), 2023-01-23
Supplement: Supplementary file 1 [file j_cppm-2022-0070_suppl.docx]

Table S1. Model efficiency indices

|  | Coefficient of determination |
| --- | --- |
|  | Mean squared errors |
|  | Root mean square values |
|  | Sum of squared errors |
|  | Sum of the absolute errors |
| N : Number of actual data  : Average of the actual value  : Actual values of the ith experiment  : Predicted values of the ith experiment | |


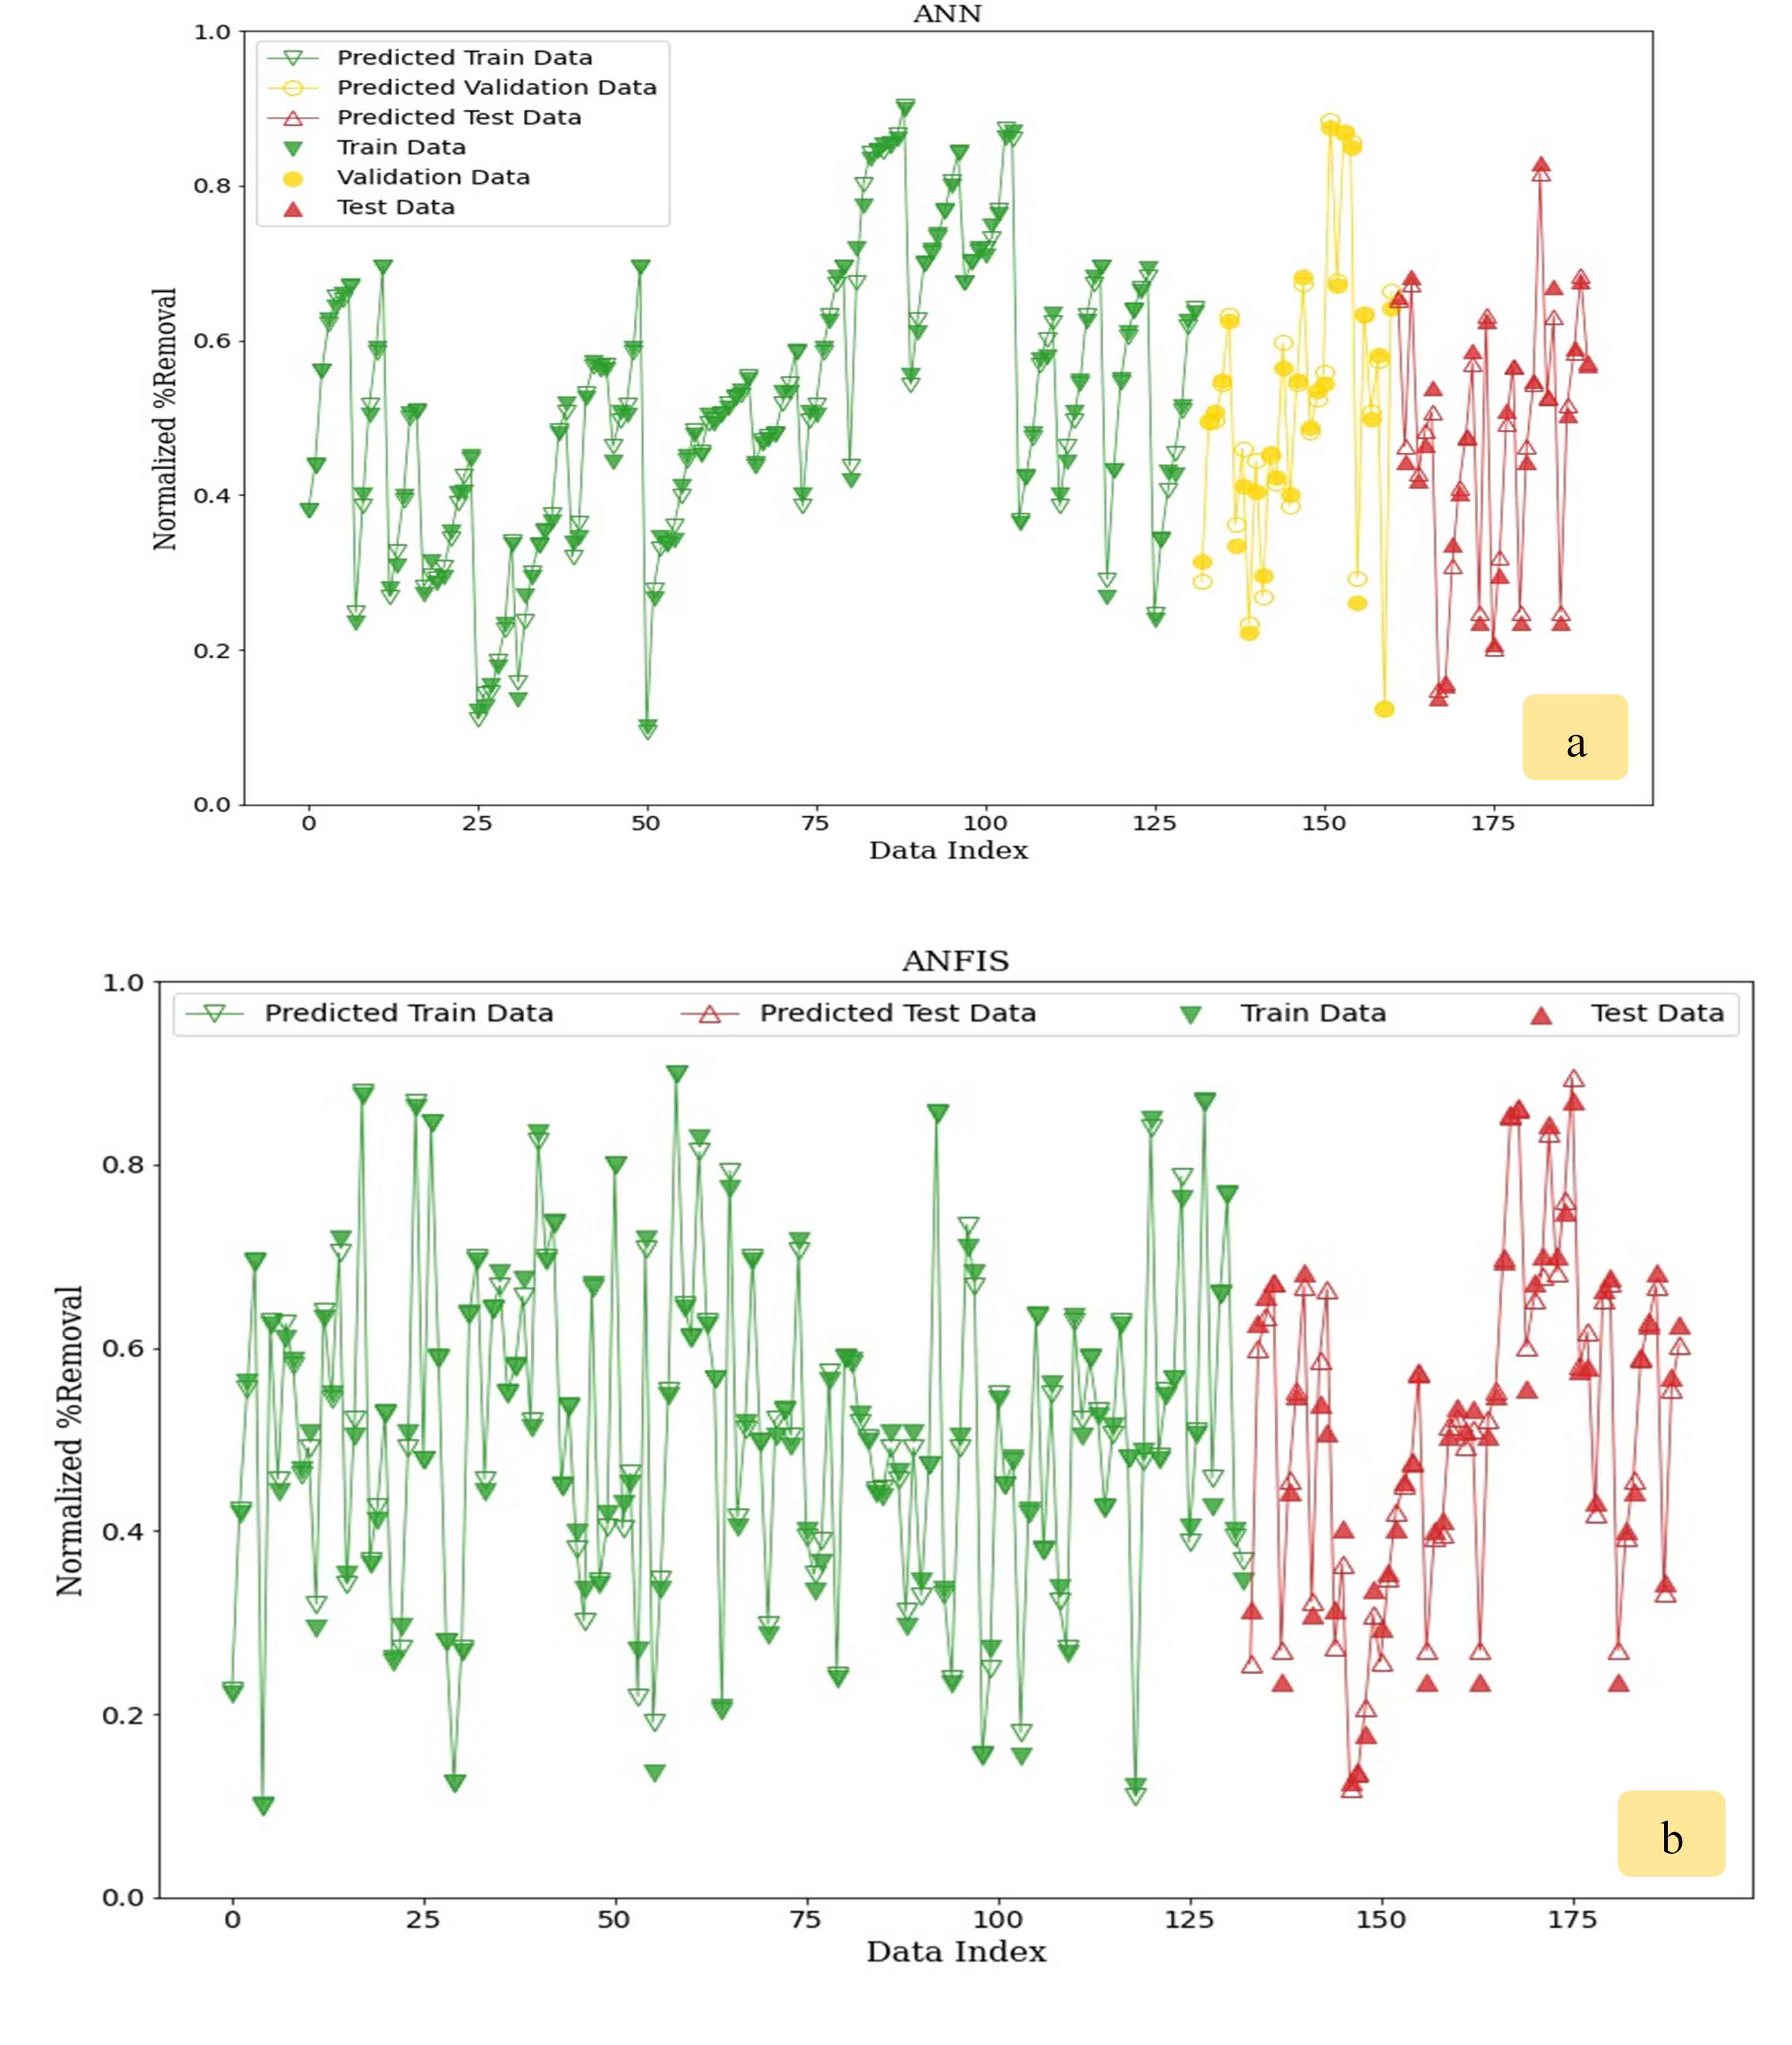


Fig. S1. Comparison of the observed data and the predicted values of (a) ANN and (b) ANFIS for all data set points

Table S2. The optimal values of hyperparameters for the ANN and ANFIS tools.

| **Method** | **Type** | **Value/comment** |
| --- | --- | --- |
| ANN | Number of hidden layers | 1 |
| Number of hidden neurons | 15 |
| Number of data used for training | 134 |
| Number of data used for testing | 28 |
| Number of data used for validating | 28 |
| Training algorithm | Back propagation (LM) |
| Activation function | Tansig |
| Number of epochs | 49 |
| ANFIS | Number of nodes | 135 |
| Number of linear parameters | 63 |
| Number of nonlinear parameters | 108 |
| Total number of parameters | 171 |
| Number of training data pairs | 133 |
| Number of testing data pairs | 57 |
| Number of fuzzy rules | 9 |
| Training maximum epoch number | 80 |
| Fuzzy structure | Sugeno |
| Initial FIS for training | Subtractive clustering |
| MF type | Gaussian |
| Output MF | Linear |
| Optimization method | Hybrid |
| Radius | 0.6 |
